# Supplementary material for: Plasma Phospholipid Polyunsaturated Fatty Acid Associations with Neurocognition
Source: MDPI journal article supplement (doi:10.3390/nu15214542), 2023-10-26
Supplement: s1 [file s1]

**Supplementary Tables S1-S12. Linear regression models of LC-PUFA and group interactions in neurocognitive assessment outcomes.** Assessment outcomes were designated the response variable, LC-PUFA as the predictor variable, and group as a main effect and as an interaction with the predictor variable. Age was included as a covariate. Abbreviations: AA, Arachidonic Acid; CPT, Continuous Performance Task; DHA, Docosahexaenoic Acid; EPA, Eicosapentaenoic Acid; OAT, Object Alternation Task; WCST, Wisconsin Card Sort Task.

**Table S1. EPA-CPT Group Interaction Model**

|           | Df | Sum Sq | Mean Sq | F value | Pr(>F) |
|-----------|----|--------|---------|---------|--------|
| Age       | 1  | 3.009  | 3.009   | 3.578   | 0.063  |
| Group     | 2  | 1.009  | 0.504   | 0.6     | 0.552  |
| EPA       | 1  | 0.076  | 0.076   | 0.09    | 0.765  |
| Group:EPA | 2  | 8.214  | 4.107   | 4.883   | 0.01   |
| Residuals | 67 | 56.348 | 0.841   |         |        |

**Table S2. DHA-CPT Group Interaction Model**

|           | Df | Sum Sq | Mean Sq | F value | Pr(>F) |
|-----------|----|--------|---------|---------|--------|
| Age       | 1  | 3.009  | 3.009   | 3.33    | 0.072  |
| Group     | 2  | 1.009  | 0.504   | 0.558   | 0.575  |
| DHA       | 1  | 1.813  | 1.813   | 2.006   | 0.161  |
| Group:DHA | 2  | 2.292  | 1.146   | 1.268   | 0.288  |
| Residuals | 67 | 60.533 | 0.903   |         |        |

**Table S3. AA-CPT Group Interaction Model**

|          | Df | Sum Sq | Mean Sq | F value | Pr(>F) |
|----------|----|--------|---------|---------|--------|
| Age      | 1  | 3.009  | 3.009   | 3.255   | 0.076  |
| Group    | 2  | 1.009  | 0.504   | 0.546   | 0.582  |
| AA       | 1  | 0.123  | 0.123   | 0.133   | 0.716  |
| Group:AA | 2  | 2.582  | 1.291   | 1.397   | 0.254  |

**Table S4. EPA-Stroop Group Interaction Model**

|           | Df | Sum Sq | Mean Sq | F value | Pr(>F) |
|-----------|----|--------|---------|---------|--------|
| Age       | 1  | 10.45  | 10.45   | 7.694   | 0.007  |
| Group     | 2  | 1.938  | 0.969   | 0.713   | 0.494  |
| EPA       | 1  | 0      | 0       | 0       | 0.992  |
| Group:EPA | 2  | 4.065  | 2.032   | 1.496   | 0.231  |
| Residuals | 67 | 90.997 | 1.358   |         |        |

**Table S5. DHA-Stroop Group Interaction Model**

|           | Df | Sum Sq  | Mean Sq | F value | Pr(>F) |
|-----------|----|---------|---------|---------|--------|
| Age       | 1  | 15.006  | 15.006  | 6.97    | 0.01   |
| Group     | 2  | 5.811   | 2.906   | 1.35    | 0.266  |
| DHA       | 1  | 2.914   | 2.914   | 1.354   | 0.249  |
| Group:DHA | 2  | 4.051   | 2.026   | 0.941   | 0.395  |
| Residuals | 67 | 144.245 | 2.153   |         |        |

**Table S6. AA-Stroop Group Interaction Model**

|           | Df | Sum Sq  | Mean Sq | F value | Pr(>F) |
|-----------|----|---------|---------|---------|--------|
| Age       | 1  | 15.006  | 15.006  | 7.097   | 0.01   |
| Group     | 2  | 5.811   | 2.906   | 1.374   | 0.26   |
| AA        | 1  | 7.375   | 7.375   | 3.488   | 0.066  |
| Group:AA  | 2  | 2.167   | 1.084   | 0.513   | 0.601  |
| Residuals | 67 | 141.668 | 2.114   |         |        |

**Table S7. EPA-OAT Group Interaction Model**

|      | Df | Deviance | Resid. Df | Resid. Dev | Pr(>Chi) |
|------|----|----------|-----------|------------|----------|
| Null |    |          | 74        | 92.461     |          |
| Age  | 1  | 9.147    | 73        | 83.314     | 0.002    |

|                  |   |       |    |        |       |
|------------------|---|-------|----|--------|-------|
| <b>Group</b>     | 2 | 4.674 | 71 | 78.64  | 0.097 |
| <b>EPA</b>       | 1 | 0.874 | 70 | 77.765 | 0.35  |
| <b>Group:EPA</b> | 2 | 2.216 | 68 | 75.549 | 0.33  |

**Table S8. DHA-OAT Group Interaction Model**

|                  | Df | Deviance | Resid.<br>Df | Resid.<br>Dev | Pr(>Chi) |
|------------------|----|----------|--------------|---------------|----------|
| <b>Null</b>      |    |          | 74           | 92.461        |          |
| <b>Age</b>       | 1  | 9.147    | 73           | 83.314        | 0.002    |
| <b>Group</b>     | 2  | 4.674    | 71           | 78.64         | 0.097    |
| <b>DHA</b>       | 1  | 0.122    | 70           | 78.517        | 0.727    |
| <b>Group:DHA</b> | 2  | 0.518    | 68           | 77.999        | 0.772    |

**Table S9. AA-OAT Group Interaction Model**

|                 | Df | Deviance | Resid.<br>Df | Resid.<br>Dev | Pr(>Chi) |
|-----------------|----|----------|--------------|---------------|----------|
| <b>Null</b>     |    |          | 74           | 92.461        |          |
| <b>Age</b>      | 1  | 9.147    | 73           | 83.314        | 0.002    |
| <b>Group</b>    | 2  | 4.674    | 71           | 78.64         | 0.097    |
| <b>AA</b>       | 1  | 7.643    | 70           | 70.997        | 0.006    |
| <b>Group:AA</b> | 2  | 2.989    | 68           | 68.008        | 0.224    |

**Table S10. EPA-WCST Group Interaction Model**

|                  | Df | Sum<br>Sq | Mean<br>Sq | F<br>value | Pr(>F) |
|------------------|----|-----------|------------|------------|--------|
| <b>Age</b>       | 1  | 5.006     | 5.006      | 9.586      | 0.003  |
| <b>Group</b>     | 2  | 1.639     | 0.82       | 1.57       | 0.216  |
| <b>EPA</b>       | 1  | 0.177     | 0.177      | 0.338      | 0.563  |
| <b>Group:EPA</b> | 2  | 0.026     | 0.013      | 0.025      | 0.975  |
| <b>Residuals</b> | 67 | 34.987    | 0.522      |            |        |

**Table S11. DHA-WCST Group Interaction Model**

|           | Df | Sum Sq | Mean Sq | F value | Pr(>F) |
|-----------|----|--------|---------|---------|--------|
| Age       | 1  | 5.006  | 5.006   | 10.021  | 0.002  |
| Group     | 2  | 1.639  | 0.82    | 1.641   | 0.202  |
| DHA       | 1  | 1.275  | 1.275   | 2.552   | 0.115  |
| Group:DHA | 2  | 0.444  | 0.222   | 0.444   | 0.643  |
| Residuals | 67 | 33.471 | 0.5     |         |        |

**Table S12. AA-WCST Group Interaction Model**

|           | Df | Sum Sq | Mean Sq | F value | Pr(>F) |
|-----------|----|--------|---------|---------|--------|
| Age       | 1  | 5.006  | 5.006   | 10.609  | 0.002  |
| Group     | 2  | 1.639  | 0.82    | 1.737   | 0.184  |
| AA        | 1  | 2.219  | 2.219   | 4.703   | 0.034  |
| Group:AA  | 2  | 1.355  | 0.677   | 1.436   | 0.245  |
| Residuals | 67 | 31.615 | 0.472   |         |        |
